# Supplementary material for: Tissue-autonomous immune response regulates stress signaling during hypertrophy
Source: eLife. 2020 Dec 30;9:e64919. doi: 10.7554/eLife.64919 (PMC7880693; doi:10.7554/eLife.64919)
Supplement: Supplementary file 1. [file elife-64919-supp1.docx]

***Supplementary File 1***

***Figure 1***

**A-C**

☿ w1118,BxGal4;;UAS-GFP x ♂ w1118

☿ w1118,BxGal4;;UAS-GFP x ♂ w1118;;UAS-RasV12

**D**

☿ w1118,BxGal4 x ♂ w1118

☿ w1118,BxGal4 x ♂ w1118;;UAS-RasV12

**E-F**

☿ w1118,BxGal4;;Drs-GFP x ♂ w1118

☿ w1118,BxGal4;;Drs-GFP x ♂ w1118;;UAS-RasV12

***Figure1-figure supplement 1***

**A**

☿ w1118,BxGal4,UAS-mCD8::RFP x ♂ w1118

☿ w1118,BxGal4,UAS-mCD8::RFP x ♂ w1118;;UAS-RasV12

**B**

☿ w1118,BxGal4;;Drs-GFP x ♂ w1118

☿ w1118,BxGal4;;Drs-GFP x ♂ w1118;;UAS-RasV12

**C**

☿ w1118,BxGal4;;UAS-GFP x ♂ w1118

☿ w1118,BxGal4;;UAS-GFP x ♂ w1118;;UAS-RasV12

☿ w1118,BxGal4;;UAS-GFP x ♂ y,w1118;UAS-l(2)glRNAi

☿ w1118,BxGal4;;UAS-GFP x ♂ w1118;UAS-l(2)glRNAi;UAS-RasV12

**D-F**

☿ w1118,BxGal4 x ♂ w1118

☿ w1118,BxGal4 x ♂ w1118;;UAS-RasV12

☿ w1118,BxGal4 x ♂ y,w1118;UAS-l(2)glRNAi

☿ w1118,BxGal4 x ♂ w1118;UAS-l(2)glRNAi;UAS-RasV12

**G-H**

☿ w1118,BxGal4;;Drs-GFP x ♂ w1118

☿ w1118,BxGal4;;Drs-GFP x ♂ w1118;;UAS-RasV12

☿ w1118,BxGal4;;Drs-GFP x ♂ y,w1118;UAS-l(2)glRNAi

☿ w1118,BxGal4;;Drs-GFP x ♂ w1118;UAS-l(2)glRNAi;UAS-RasV12

**I**

☿ w1118,BxGal4;;Drs-GFP x ♂ w1118;;UAS-RasV12

***Figure 2***

**A**

☿ w1118,BxGal4;;Drs-GFP x ♂ w1118

☿ w1118,BxGal4;;Drs-GFP x ***♂*** w1118;;UAS-RasV12

☿ w1118,BxGal4;;Drs-GFP x ♂ w1118;UAS-imdRNAi; UAS-RasV12

☿ w1118,BxGal4;;Drs-GFP x ♂ w1118 ;UAS-FaddRNAi; UAS-RasV12

☿ w1118,BxGal4;;Drs-GFP x ♂ w1118;UAS-keyRNAi; UAS-RasV12

☿ w1118,BxGal4;;Drs-GFP x ♂ w1118;UAS-RelRNAi; UAS-RasV12

☿ w1118,BxGal4;;Drs-GFP x ♂ w1118;UAS-spzRNAi; UAS-RasV12

☿ w1118,BxGal4;;Drs-GFP x ♂ w1118;UAS-TlRNAi; UAS-RasV12

☿ w1118,BxGal4;;Drs-GFP x ♂ w1118;UAS-Myd88RNAi; UAS-RasV12

☿ w1118,BxGal4;;Drs-GFP x ♂ w1118;UAS-pllRNAi; UAS-RasV12

☿ w1118,BxGal4;;Drs-GFP x ♂ w1118;UAS-DifRNAi; UAS-RasV12 (30578/GD)

☿ w1118,BxGal4;;Drs-GFP x ♂ w1118;UAS-DifRNAi; UAS-RasV12 (30579/GD)

☿ w1118,BxGal4;;Drs-GFP x ♂ w1118;UAS-dlRNAi; UAS-RasV12

**B**

☿ w1118,BxGal4;;Drs-GFP x ♂ w1118

☿ w1118,BxGal4;;Drs-GFP x ***♂*** w1118;;UAS-RasV12

☿ w1118,BxGal4;;Drs-GFP x ***♂*** y1,sc*,v1,sev21;UAS-dlRNAi

☿ w1118,BxGal4;;Drs-GFP x ***♂*** w1118;UAS-dlRNAi;UAS-RasV12

**C**

☿ w1118,BxGal4 x ♂ w1118

☿ w1118,BxGal4 x ***♂*** w1118;;UAS-RasV12

☿ w1118,BxGal4 x ♂ w1118;dl15/CyO,GFP;UAS-RasV12

☿ w1118,BxGal4;dl15/CyO,GFP x ♂ w1118;dl15/CyO,GFP;UAS-RasV12

***Figure 2-figure supplement 1***

**A-A’’**

☿ w1118,BxGal4;;Drs-GFP x ♂ w1118;;UAS-RasV12

***Figure 2-figure supplement 2***

**A**

☿ w1118,BxGal4;;Drs-GFP x ♂ w1118

☿ w1118,BxGal4;;Drs-GFP x ♂ w1118;;UAS-RasV12

☿ w1118,BxGal4;;Drs-GFP x ♂ w1118;UAS-cadRNAi;UAS-RasV12

☿ w1118,BxGal4;;Drs-GFP x ♂ w1118;UAS-dfrRNAi;UAS-RasV12

**B**

☿ w1118,BxGal4;;Drs-GFP x ***♂*** w1118;;UAS-RasV12

**C**

☿ w1118,BxGal4 x ♂ w1118

☿ w1118,BxGal4 x ***♂*** w1118;;UAS-RasV12

☿ w1118,BxGal4 x ***♂*** y1,sc*,v1,sev21;UAS-dlRNAi

☿ w1118,BxGal4 x ***♂*** w1118;UAS-dlRNAi;UAS-RasV12

**D**

☿ w1118,BxGal4 x ♂ w1118

☿ w1118,BxGal4 x ♂ w1118;dl15/CyO,GFP

☿ w1118,BxGal4 x ***♂*** w1118;;UAS-RasV12

☿ w1118,BxGal4 x ♂ w1118;dl15/CyO,GFP;UAS-RasV12

☿ w1118,BxGal4;dl15/CyO,GFP x ♂ w1118 ;dl15/CyO,GFP

☿ w1118,BxGal4;dl15/CyO,GFP x ♂ w1118;dl15/CyO,GFP;UAS-RasV12

**E**

☿ w1118,BxGal4 x ♂ w1118

☿ w1118,BxGal4 x ♂ w1118;Myd88KG03447/CyO,GFP

☿ w1118,BxGal4 x ***♂*** w1118;;UAS-RasV12

☿ w1118,BxGal4 x ♂ w1118;Myd88KG03447/CyO,GFP;UAS-RasV12

☿ w1118,BxGal4;Myd88KG03447/CyO,GFP x ♂ w1118 ;Myd88KG03447/CyO,GFP

☿ w1118,BxGal4;Myd88KG03447/CyO,GFP x ♂ w1118;Myd88KG03447/CyO,GFP;UAS-RasV12

***Figure 2-figure supplement 3***

**A**

☿ w1118,BxGal4;;Drs-GFP x ♂ w1118;;UAS-RasV12

☿ w1118,BxGal4;;Drs-GFP x ♂ w1118;UAS-dlRNAi;UAS-RasV12

**B**

☿ w1118,BxGal4 x ♂ w1118

☿ w1118,BxGal4 x ♂ w1118;;UAS-RasV12

☿ w1118,BxGal4;;Drs-GFP x ♂ w1118;UAS-l(2)glRNAi;UAS-RasV12

**C**

☿ w1118,BxGal4;;Drs-GFP x ♂ w1118

☿ w1118,BxGal4;;Drs-GFP x ♂ w1118;;UAS-RasV12

☿ w1118,BxGal4;;Drs-GFP x ♂ w1118;UAS-Stat92E RNAi;UAS-RasV12

☿ w1118,BxGal4;;Drs-GFP x ♂ w1118;UAS-foxo RNAi;UAS-RasV12

☿ w1118,BxGal4;;Drs-GFP x ♂ w1118;UAS-grhRNAi;UAS-RasV12

☿ w1118,BxGal4;;Drs-GFP x ♂ w1118;UAS-Mef2RNAi;UAS-RasV12

☿ w1118,BxGal4;;Drs-GFP x ♂ w1118;UAS-Nrf2RNAi;UAS-RasV12 (101235/KK)

☿ w1118,BxGal4;;Drs-GFP x ♂ w1118;UAS-Nrf2RNAi;UAS-RasV12 (108127/GD)

☿ w1118,BxGal4;;Drs-GFP x ♂ w1118;UAS-Sox14RNAi;UAS-RasV12

***Figure 3***

**A-E**

☿ w1118,BxGal4 x ♂ w1118

☿ w1118,BxGal4 x ♂ w1118;;UAS-RasV12

☿ w1118,BxGal4;;Drs-GFP x ♂ w1118;UAS-l(2)glRNAi;UAS-RasV12

**F**

☿ w1118,BxGal4;TREGFP1b/CyO,GFP x ♂ w1118

☿ w1118,BxGal4;TREGFP1b/CyO,GFP x ***♂*** w1118;;UAS-RasV12

***Figure 3-figure supplement 1***

**A-C**

☿ w1118,BxGal4 x ♂ w1118

☿ w1118,BxGal4 x ♂ w1118;;UAS-RasV12

☿ w1118,BxGal4;;Drs-GFP x ♂ w1118;UAS-l(2)glRNAi;UAS-RasV12

**D**

☿ w1118,BxGal4;;Drs-GFP x ♂ w1118

☿ w1118,BxGal4;;Drs-GFP x ♂ w1118;;UAS-RasV12

**E**

☿ w1118,BxGal4 x ♂ w1118

☿ w1118,BxGal4 x ♂ w1118;;UAS-RasV12

☿ w1118,BxGal4 x ***♂*** y1,sc*,v1,sev21;UAS-dlRNAi

☿ w1118,BxGal4 x ***♂*** w1118;UAS-dlRNAi;UAS-RasV12

☿ w1118,BxGal4 x ♂ w1118;UAS-CecA1

☿ w1118,BxGal4 x ♂ w1118;UAS-CecA1;UAS-RasV12

**F**

☿ w1118,BxGal4;10xStat92E-GFP x ♂ w1118

☿ w1118,BxGal4;10xStat92E-GFP x ♂ w1118;;UAS-RasV12

☿ w1118,BxGal4;10xStat92E-GFP x ♂ w1118;UAS-l(2)glRNAi;UAS-RasV12

***Figure 3-figure supplement 2***

**A**

☿ w1118,BxGal4 x ♂ w1118

☿ w1118,BxGal4 x ♂ w1118;;UAS-RasV12

☿ w1118,BxGal4 x ♂ w1118;UAS-l(2)glRNAi;UAS-RasV12

**B**

☿ w1118,BxGal4;TREGFP1b/CyO,GFP x ♂ w1118

☿ w1118,BxGal4;TREGFP1b/CyO,GFP x ***♂*** w1118;;UAS-RasV12

☿ w1118,BxGal4;TREGFP1b/CyO,GFP x ♂ y,w1118;UAS-l(2)glRNAi

☿ w1118,BxGal4;TREGFP1b/CyO,GFP x ♂ w1118;UAS-l(2)glRNAi;UAS-RasV12

***Figure 4***

**A**

☿ w1118,BxGal4 x ♂ w1118

☿ w1118,BxGal4 x ♂ w1118;;UAS-RasV12

☿ w1118,BxGal4 x ♂ w1118;;UAS-Drs

☿ w1118,BxGal4 x ♂ w1118;;UAS-Drs,UAS-RasV12

☿ w1118,BxGal4 x ♂ w1118,UAS-jnkDN

☿ w1118,BxGal4 x ♂ w1118,UAS-jnkDN;; UAS-RasV12

**B-D**

☿ w1118,BxGal4;vkgG00454/CyO,GFP x ♂ w1118

☿ w1118,BxGal4;vkgG00454/CyO,GFP x ♂ w1118;;UAS-RasV12

☿ w1118,BxGal4;vkgG00454/CyO,GFP x ♂ w1118;;UAS-Drs

☿ w1118,BxGal4;vkgG00454/CyO,GFP x ♂ w1118;;UAS-Drs,UAS-RasV12

☿ w1118,BxGal4;vkgG00454/CyO,GFP x ♂ w1118,UAS-jnkDN

☿ w1118,BxGal4;vkgG00454/CyO,GFP x ♂ w1118,UAS-jnkDN;; UAS-RasV12

**E**

☿ w1118,BxGal4 x ♂ w1118

☿ w1118,BxGal4 x ♂ w1118;;UAS-RasV12

**F-G**

☿ w1118,BxGal4 x ♂ w1118

☿ w1118,BxGal4 x ♂ w1118;;UAS-RasV12

☿ w1118,BxGal4;Mmp2k00604/CyO,GFP x ♂ w1118

☿ w1118,BxGal4;Mmp2k00604/CyO,GFP x ♂ w1118;;UAS-RasV12

☿ w1118,BxGal4;Mmp2k00604/CyO,GFP x ♂ w1118;Mmp2k00604/CyO,GFP;UAS-RasV12

***Figure 4-figure supplement 1***

**A**

☿ w1118,BxGal4 x ♂ w1118

☿ w1118,BxGal4,UAS-mCD8::RFP x ♂ w1118

☿ w1118,BxGal4 x ♂ w1118;;UAS-RasV12

☿ w1118,BxGal4,UAS-mCD8::RFP x ♂ w1118;;UAS-RasV12

☿ w1118,BxGal4,UAS-mCD8::RFP x ♂ w1118;;UAS-Drs

☿ w1118,BxGal4 x ♂ w1118;;UAS-Drs,UAS-RasV12

**B**

☿ w1118,BxGal4;vkgG00454/CyO,GFP x ♂ w1118

☿ w1118,BxGal4;vkgG00454/CyO,GFP x ♂ w*;UAS-Mmp1APM3099/CyO,Tb

☿ w1118,BxGal4;vkgG00454/CyO,GFP x ♂ w*;UAS-Mmp1APM1037/TM3

☿ w1118,BxGal4;vkgG00454/CyO,GFP x ♂ w*;UAS-Mmp2#4/CyO

**C**

☿ w1118,BxGal4 x ♂ w1118

☿ w1118,BxGal4 x ♂ w1118;;UAS-RasV12

☿ w1118,BxGal4;Mmp2k00604/CyO,GFP x ♂ w1118

☿ w1118,BxGal4;Mmp2k00604/CyO,GFP x ♂ w1118;;UAS-RasV12

☿ w1118,BxGal4;Mmp2k00604/CyO,GFP x ♂ w1118;Mmp2k00604/CyO,GFP;UAS-RasV12

**D**

☿ w1118,BxGal4 x ♂ w1118

☿ w1118,BxGal4 x ♂ w1118;;UAS-RasV12

☿ w1118,BxGal4 x ♂ w1118;;UAS-Drs

☿ w1118,BxGal4 x ♂ w1118;;UAS-Drs,UAS-RasV12

☿ w1118,BxGal4 x ♂ w1118,UAS-jnkDN

☿ w1118,BxGal4 x ♂ w1118,UAS-jnkDN;; UAS-RasV12

***Figure 5***

**B**

☿ w1118,BxGal4 x ♂ w1118

☿ w1118,BxGal4 x ♂ w1118;;UAS-RasV12

☿ w1118,BxGal4 x ♂ w1118;;UAS-Drs

☿ w1118,BxGal4 x ♂ w1118;;UAS-Drs,UAS-RasV12

**C-F**

☿ w1118,BxGal4;;TREGFP1b ♂ w1118

☿ w1118,BxGal4;;TREGFP1b x ♂ w1118;;UAS-RasV12

☿ w1118,BxGal4;;TREGFP1b x ♂ w1118;;UAS-Drs

☿ w1118,BxGal4;;TREGFP1b x ♂ w1118;;UAS-Drs,UAS-RasV12

***Figure 5-figure supplement 1***

**A**

☿ w1118,BxGal4;;Drs-GFP ♂ w1118

☿ w1118,BxGal4;;Drs-GFP x ♂ w1118;;UAS-RasV12

☿ w1118,BxGal4;;Drs-GFP x ♂ w1118,UAS-jnkDN

☿ w1118,BxGal4;;Drs-GFP x ♂ w1118,UAS-jnkDN;; UAS-RasV12

**B**

☿ w1118,BxGal4 x ♂ w1118

☿ w1118,BxGal4 x ♂ w1118;;UAS-RasV12

☿ w1118,BxGal4 x ♂ w1118,UAS-jnkDN

☿ w1118,BxGal4 x ♂ w1118,UAS-jnkDN;; UAS-RasV12

***Figure 5- figure supplement 2***

**A**

☿ w1118,BxGal4 x ♂ w1118;;UAS-RasV12

☿ w1118,BxGal4 x ♂ w1118;UAS-DrsRNAi;UAS-RasV12

**B**

☿ w1118,BxGal4 x ♂ w1118

☿ w1118,BxGal4 x ♂ w1118;;UAS-RasV12

☿ w1118,BxGal4 x ♂ w1118;UAS-DrsRNAi

☿ w1118,BxGal4 x ♂ w1118;UAS-DrsRNAi;UAS-RasV12

**C-D**

☿ w1118,BxGal4 x ♂ w1118

☿ w1118,BxGal4 x ♂ w1118;;UAS-RasV12

☿ w1118,BxGal4 x ♂ w1118;;UAS-Drs

☿ w1118,BxGal4 x ♂ w1118;;UAS-Drs,UAS-RasV12

☿ w1118,BxGal4 x ♂ w1118;UAS-DrsRNAi;UAS-RasV12

**E-H**

☿ w1118,BxGal4;TREGFP1b/CyO,GFP x ♂ w1118

☿ w1118,BxGal4;TREGFP1b/CyO,GFP x ♂ w1118;;UAS-RasV12

☿ w1118,BxGal4;TREGFP1b/CyO,GFP x ♂ w1118;;UAS-Drs

☿ w1118,BxGal4;TREGFP1b/CyO,GFP x ♂ w1118;;UAS-Drs,UAS-RasV12

☿ w1118,BxGal4;TREGFP1b/CyO,GFP x ♂ w1118;UAS-DrsRNAi

☿ w1118,BxGal4;TREGFP1b/CyO,GFP x ♂ w1118;UAS-DrsRNAi;UAS-RasV12

***Figure 5-figure supplement 3***

**A-C**

☿ w1118,BxGal4 x ♂ w1118

☿ w1118,BxGal4,UAS-mCD8::RFP x ♂ w1118

☿ w1118,BxGal4 x ♂ w1118;;UAS-RasV12

☿ w1118,BxGal4,UAS-mCD8::RFP x ♂ w1118;;UAS-RasV12

☿ w1118,BxGal4,UAS-mCD8::RFP x ♂ w1118;;UAS-Drs

☿ w1118,BxGal4 x ♂ w1118;;UAS-Drs,UAS-RasV12

***Figure 6***

**A**

☿ w1118,BxGal4 x ♂ w1118

☿ w1118,BxGal4 x ♂ w1118;;UAS-RasV12

☿ w1118,BxGal4 x ♂ w1118;;UAS-Drs

☿ w1118,BxGal4 x ♂ w1118;;UAS-Drs,UAS-RasV12

☿ w1118,BxGal4 x ♂ w1118;UAS-DrsRNAi;UAS-RasV12

**C-D**

☿ w1118,BxGal4 x ♂ w1118

☿ w1118,BxGal4 x ♂ w1118;;UAS-RasV12

☿ w1118,BxGal4 x ♂ w1118,UAS-jnkDN

☿ w1118,BxGal4 x ♂ w1118,UAS-jnkDN;; UAS-RasV12

☿ w1118,BxGal4 x ♂ w1118;UAS-p35

☿ w1118,BxGal4 x ♂ w1118;UAS-p35;UAS-RasV12

☿ w1118,BxGal4 x ♂ w1118;;UAS-Drs

☿ w1118,BxGal4 x ♂ w1118;;UAS-Drs,UAS-RasV12

**E-F**

☿ w1118,BxGal4;TREGFP1b/CyO,GFP x ♂ x w1118

☿ w1118,BxGal4;TREGFP1b/CyO,GFP x ♂ w1118;;UAS-RasV12

☿ w1118,BxGal4;TREGFP1b/CyO,GFP x ♂ w1118;;UAS-Drs

☿ w1118,BxGal4;TREGFP1b/CyO,GFP x ♂ w1118;;UAS-Drs,UAS-RasV12

***Figure 6-figure supplement 1***

**A-B**

☿ w1118,BxGal4;TREGFP1b/CyO,GFP x ♂ w1118

☿ w1118,BxGal4;TREGFP1b/CyO,GFP x ♂ w1118;;UAS-RasV12

☿ w1118,BxGal4;TREGFP1b/CyO,GFP x ♂ w1118;;UAS-Drs

☿ w1118,BxGal4;TREGFP1b/CyO,GFP x ♂ w1118;;UAS-Drs,UAS-RasV12

☿ w1118,BxGal4;TREGFP1b/CyO,GFP x ♂ w1118;;UAS-DrsRNAi

☿ w1118,BxGal4;TREGFP1b/CyO,GFP x ♂ w1118;UAS-DrsRNAi;UAS-RasV12

**C-D**

☿ w1118,BxGal4 x ♂ w1118

☿ w1118,BxGal4,UAS-mCD8::RFP x ♂ w1118

☿ w1118,BxGal4 x ♂ w1118;;UAS-RasV12

☿ w1118,BxGal4,UAS-mCD8::RFP x ♂ w1118;;UAS-RasV12

☿ w1118,BxGal4,UAS-mCD8::RFP x ♂ w1118;;UAS-Drs

☿ w1118,BxGal4 x ♂ w1118;;UAS-Drs,UAS-RasV12

**E-F**

☿ w1118,BxGal4 x ♂ w1118

☿ w1118,BxGal4 x ♂ w1118;;UAS-RasV12

☿ w1118,BxGal4;;UAS-hidRNAi/TM6B x ♂ w1118

☿ w1118,BxGal4;;UAS-hidRNAi/TM6B x ♂ w1118;;UAS-RasV12

***Figure 7***

**B-C,E**

☿ w1118,BxGal4;tubGal80ts x ♂ w1118

☿ w1118,BxGal4;tubGal80ts x ♂ w*; UAS-hid

☿ w1118,BxGal4;tubGal80ts x ♂ w1118;;UAS-Drs

☿ w1118,BxGal4;tubGal80ts x ♂ w1118;UAS-hid;UAS-Drs

**D,F**

☿ w1118,BxGal4 x ♂ w1118

☿ w1118,BxGal4 x ♂ w1118;;UAS-RasV12

☿ w1118,BxGal4 x ♂ w1118;UAS-DroncRNAi (23035/GD)

☿ w1118,BxGal4 x ♂ w1118;UAS-DroncRNAi; UAS-RasV12 (23035/GD)

***Figure 7-figure supplement 1***

**A-B**

☿ w1118,BxGal4 x ♂ w1118

☿ w1118,BxGal4 x ♂ w1118;;UAS-RasV12

☿ w1118,BxGal4 x ♂ w1118;UAS-DroncRNAi (23035/GD)

☿ w1118,BxGal4 x ♂ w1118;UAS-DroncRNAi;UAS-RasV12 (23035/GD)

☿ w1118,BxGal4 x ♂ w1118;UAS-DroncRNAi (100424/KK)

☿ w1118,BxGal4 x ♂ w1118,UAS-DroncRNAi;UAS-RasV12 (100424/KK)
